# Supplementary material for: Improving the Stability and Curcumin Retention Rate of Curcumin-Loaded Filled Hydrogel Prepared Using 4αGTase-Treated Rice Starch
Source: MDPI journal article supplement (doi:10.3390/foods10010150), 2021-01-13
Supplement: s1 [file s1]

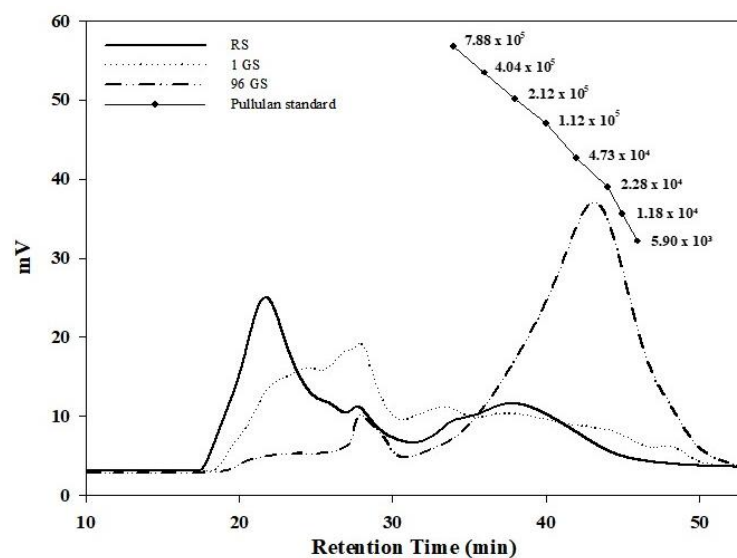

**Figure S1.** Molecular weight distributions of native rice starch (RS) and 4- $\alpha$ -glucanotransferase-treated rice starch (1 GS and 96 GS). The molecular weight (Da) of the pullulan standard was shown in the upper right.

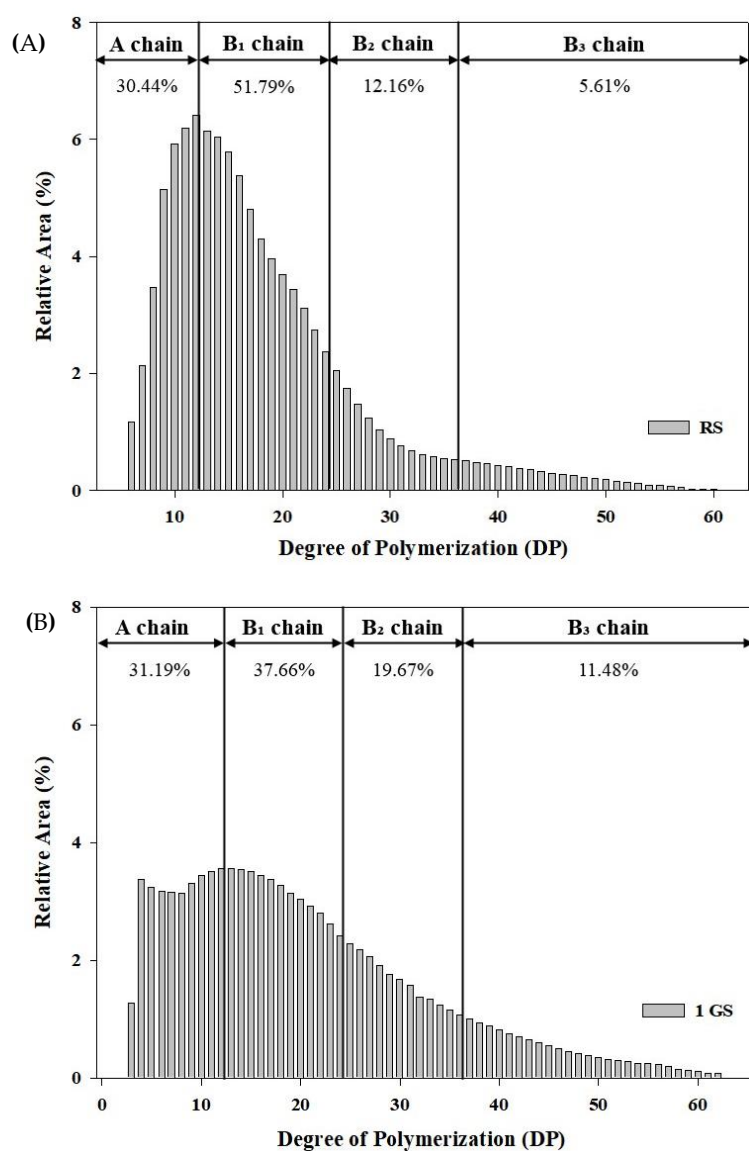

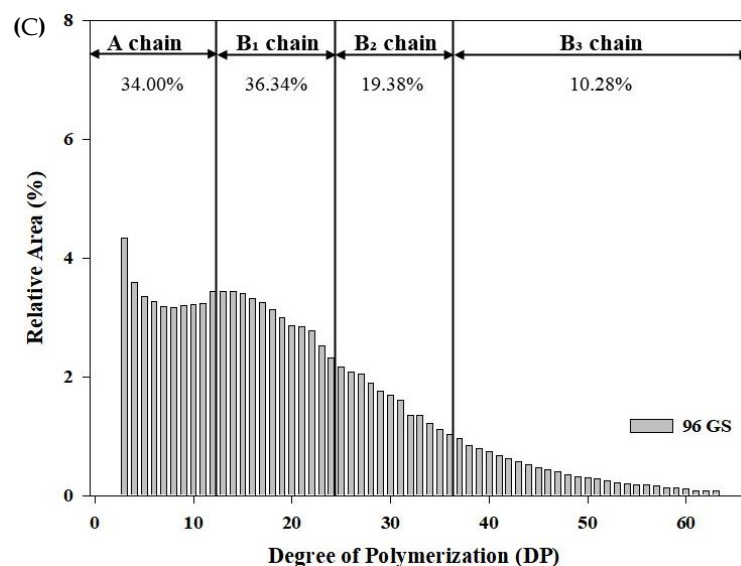

**Figure S2.** Relative branch chain length distribution of (A) native rice starch (RS), (B) rice starch treated with 4- $\alpha$ -glucanotransferase for 1 h (1 GS), and (C) rice starch treated with 4- $\alpha$ -glucanotransferase for 96 h (96 GS). A chain: DP  $\leq$  12, B<sub>1</sub> chain: DP 13-24, B<sub>2</sub> chain: DP 25-36, B<sub>3</sub> chain: DP > 36.

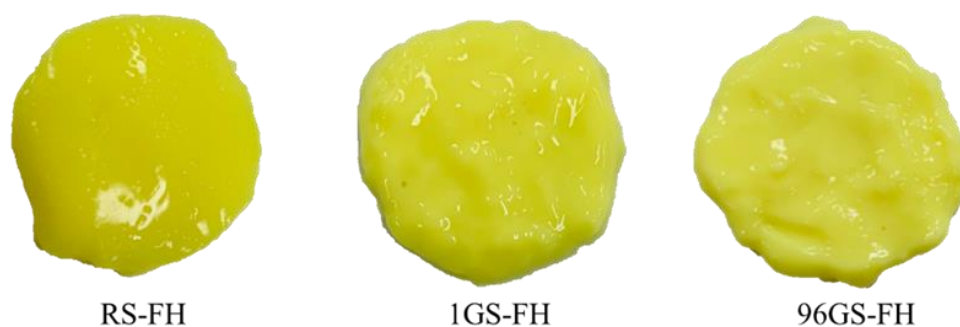

**Figure S3.** Visual appearance of the prepared curcumin loaded in native rice starch-based filled hydrogel (RS-FH), 4- $\alpha$ -glucanotransferase treated (for 1 h) rice starch-based filled hydrogel (1 GS-FH), and 4- $\alpha$ -glucanotransferase treated (for 96 h) rice starch-based filled hydrogel (96 GS-FH).
